# Supplementary material for: Microwave-assisted synthesis of nitrogen-rich carbon dots as effective fluorescent probes for sensitive detection of Ag+
Source: Royal Society of Chemistry journal article supplement (doi:10.1039/c9qm00624a), 2019-01-01
Supplement: c9qm00624a1.pdf [file c9qm00624a1.pdf]

Supporting Information for

**Microwave-assisted synthesis of nitrogen-rich carbon dots as  
effective fluorescent probe for sensitive detection of Ag<sup>+</sup>**

Jie Feng<sup>a</sup>, Xiaoran Zhao<sup>a</sup>, Wei Bian<sup>b</sup>, Xinjing Tang<sup>1a</sup>

<sup>a</sup> State Key Laboratory of Natural and Biomimetic Drugs, Department of Medicinal Chemistry, the

School of Pharmaceutical Sciences, Peking University, Beijing 100191, China

<sup>b</sup> School of Basic Medical Science, Shanxi Medical University, Taiyuan 030001, China

---

\*Corresponding author at: State Key Laboratory of Natural and Biomimetic Drugs, the  
School of Pharmaceutical Sciences, Peking University, Beijing 100191, Phone/fax:  
86-10-82805635, E-mail address: [xinjingt@bjmu.edu.cn](mailto:xinjingt@bjmu.edu.cn)

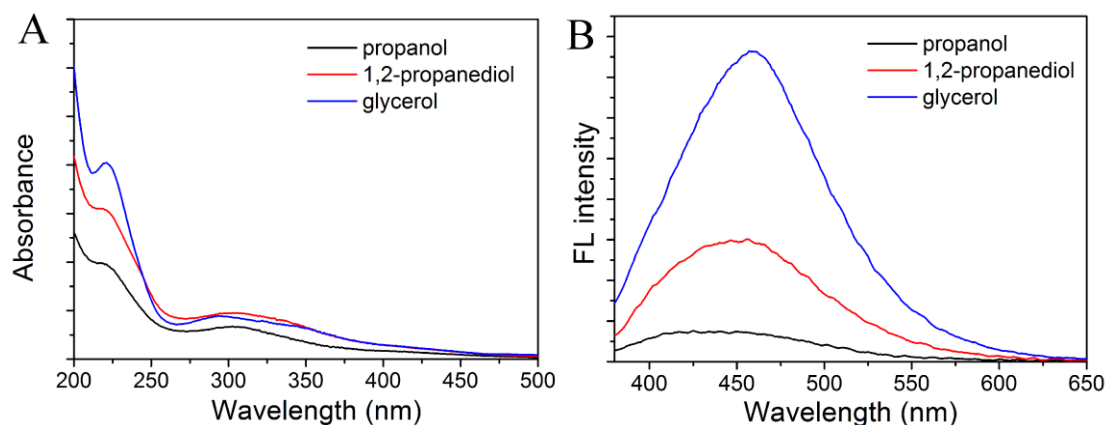

Fig. S1. The UV-vis spectra (A) and fluorescence emission spectra (B) of the nitrogen-rich CDs (N-dots) synthesized with different hydroxyl compounds as additives.

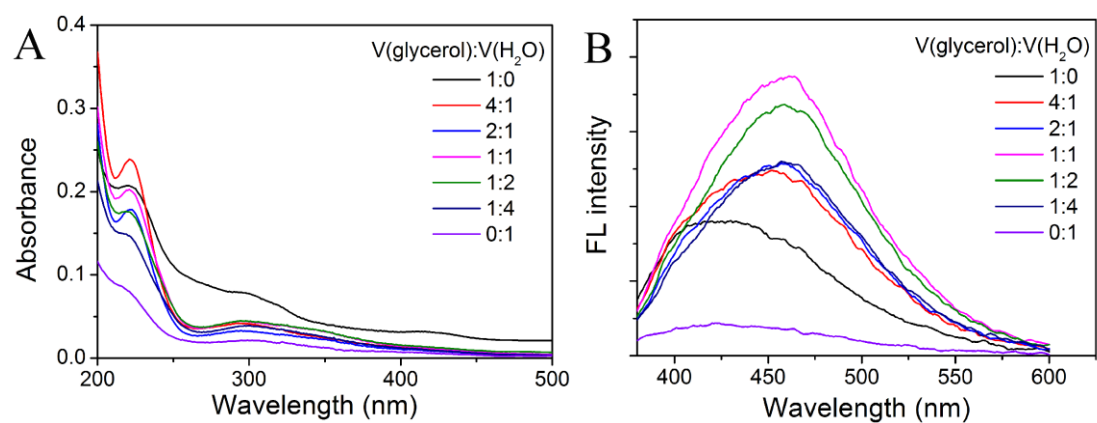

Fig. S2. The UV-vis spectra (A) and fluorescence emission spectra (B) of the N-dots synthesized at different concentrations of glycerol.

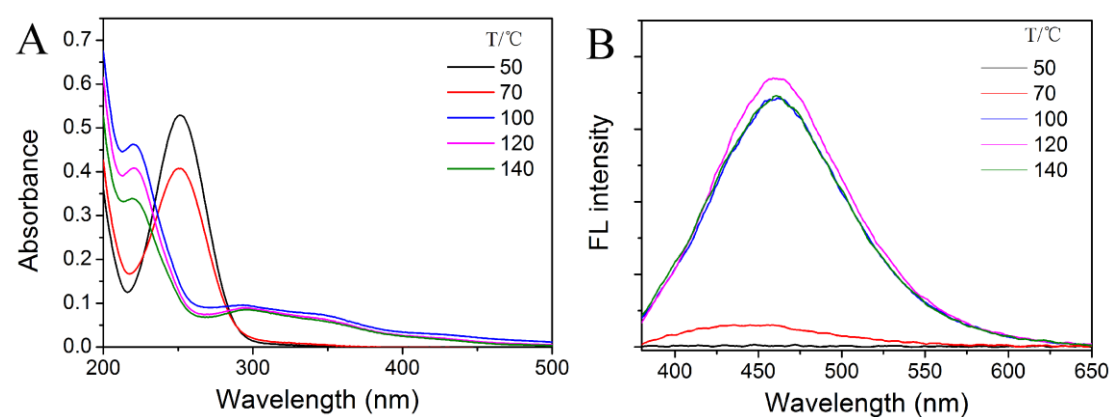

Fig. S3. The UV-vis spectra (A) and fluorescence emission spectra (B) of the N-dots synthesized at different reaction temperatures with glycerol.

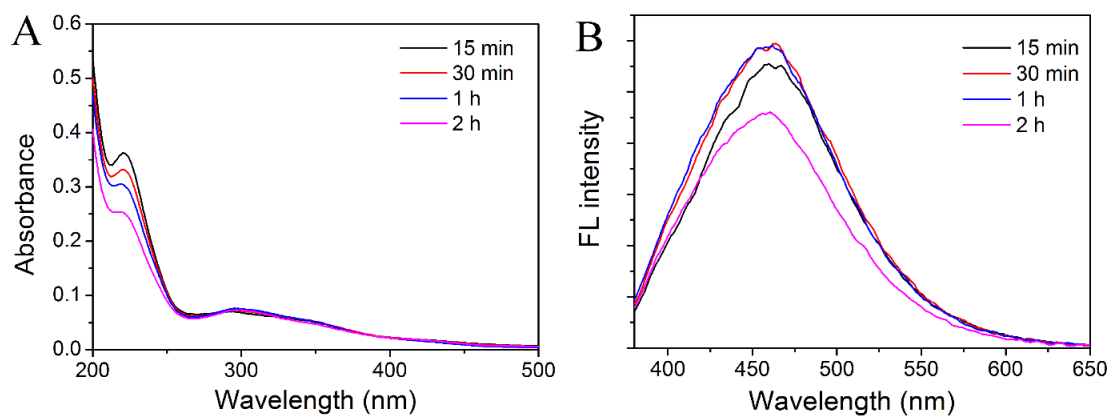

Fig. S4. The UV-vis spectra (A) and fluorescence emission spectra (B) of the N-dots synthesized at different reaction time with glycerol

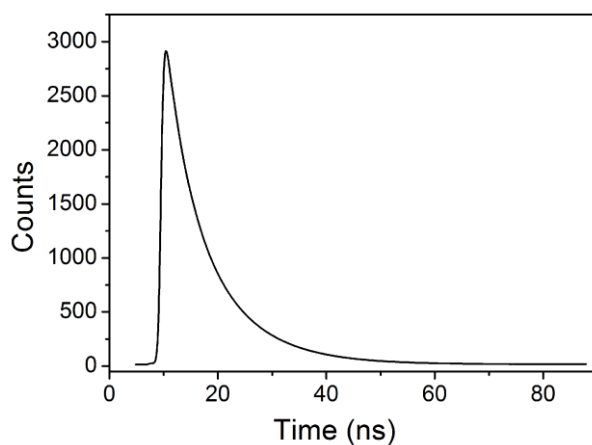

Fig. S5. The fluorescence lifetime spectrum of the N-dots (The concentration of the N-dots was 100  $\mu\text{g/mL}$ ).

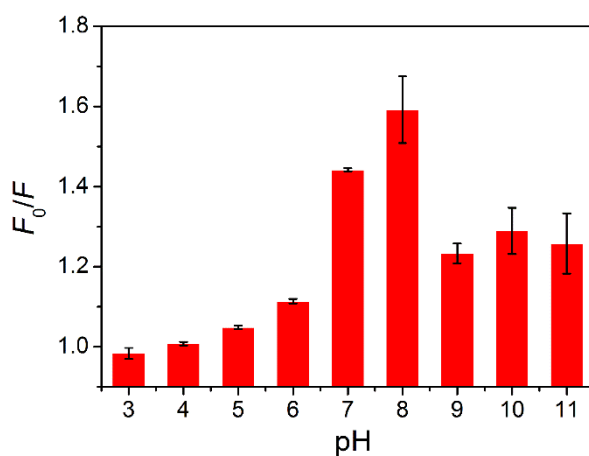

Fig. S6. pH Effect on  $\text{Ag}^+$  detection based on the fluorescence quenching efficiency ( $F_0/F$ ) (The concentrations of the N-dots and  $\text{Ag}^+$  were 100  $\mu\text{g/mL}$  and 2  $\mu\text{M}$ , respectively).

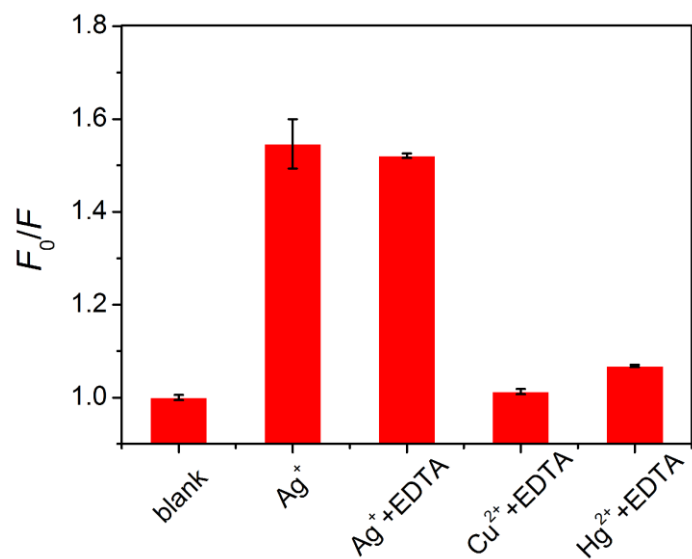

Fig. S7. Fluorescence changes of the probe towards  $\text{Ag}^+$ , the mixture of  $\text{Ag}^+$  and EDTA, the mixture of  $\text{Cu}^{2+}$  and EDTA, the mixture of  $\text{Hg}^{2+}$  and EDTA. (The concentration of the N-dots was  $100 \mu\text{g/mL}$ . The concentration of the  $\text{Ag}^+$  was  $2 \mu\text{M}$ . The concentrations of  $\text{Cu}^{2+}$  and  $\text{Hg}^{2+}$  were  $20 \mu\text{M}$ . The concentration of EDTA was  $100 \mu\text{M}$ .)

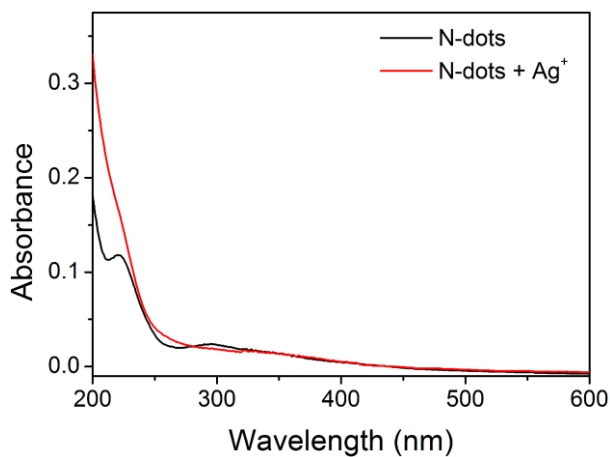

Fig. S8. The UV-vis absorption spectra of the N-dots before and after the addition of  $10 \mu\text{M}$   $\text{Ag}^+$ .

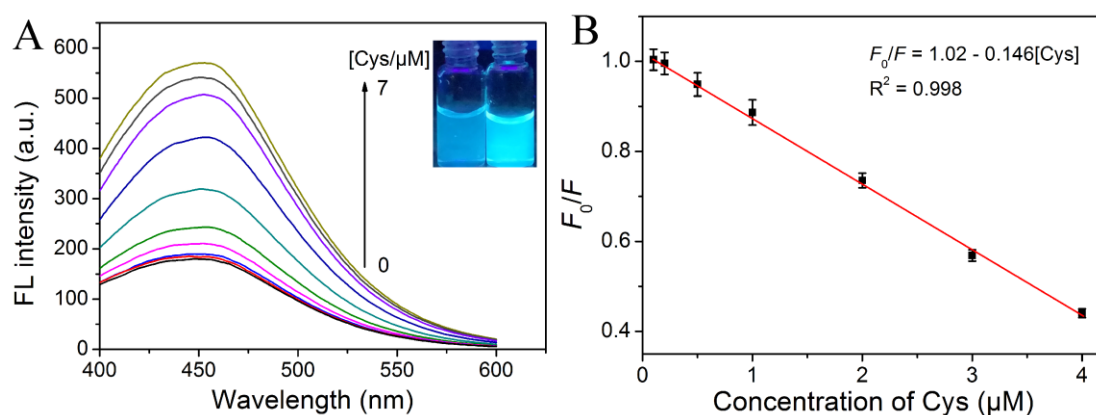

Fig. S9. (A) Fluorescence recovery of the N-dots/Ag<sup>+</sup> system in the presence of different concentrations of Cys. Inset showed the photographs of the N-dots/Ag<sup>+</sup> system in the absence and presence of 7 μM Cys under UV light (365 nm). (B) Relationship between fluorescence restoration of the N-dots versus concentration of Cys, where  $F_0$  was fluorescence intensity of the N-dots/Ag<sup>+</sup> complex and  $F$  was the fluorescence intensity of N-dots/Ag<sup>+</sup> complex with the addition of Cys. (The concentrations of the N-dots and Ag<sup>+</sup> were 100 μg/mL and 6 μM, respectively)

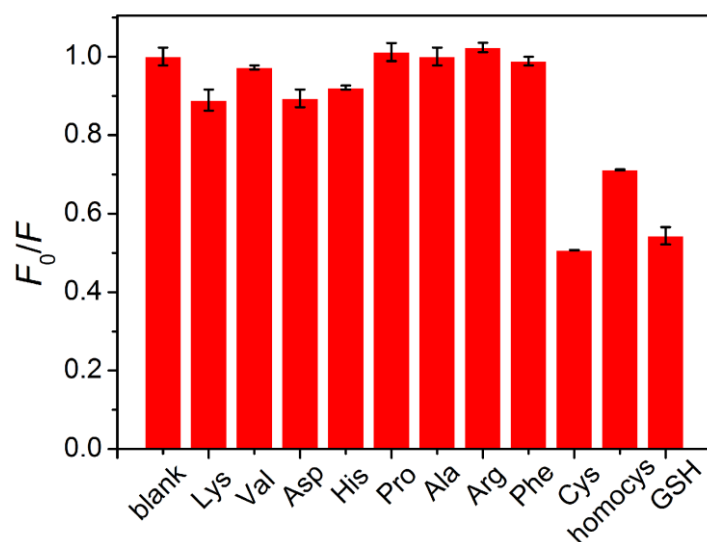

Fig. S10. Selectivity of the N-dots/Ag<sup>+</sup> complex toward Cys. (The concentrations of the N-dots and Ag<sup>+</sup> were 100 μg/mL and 2 μM, respectively. 4 μM for Cys, Hcy and GSH. 100 μM for other cations)

Fig. S11. The NMR spectra of the 2-azidoimidazole.

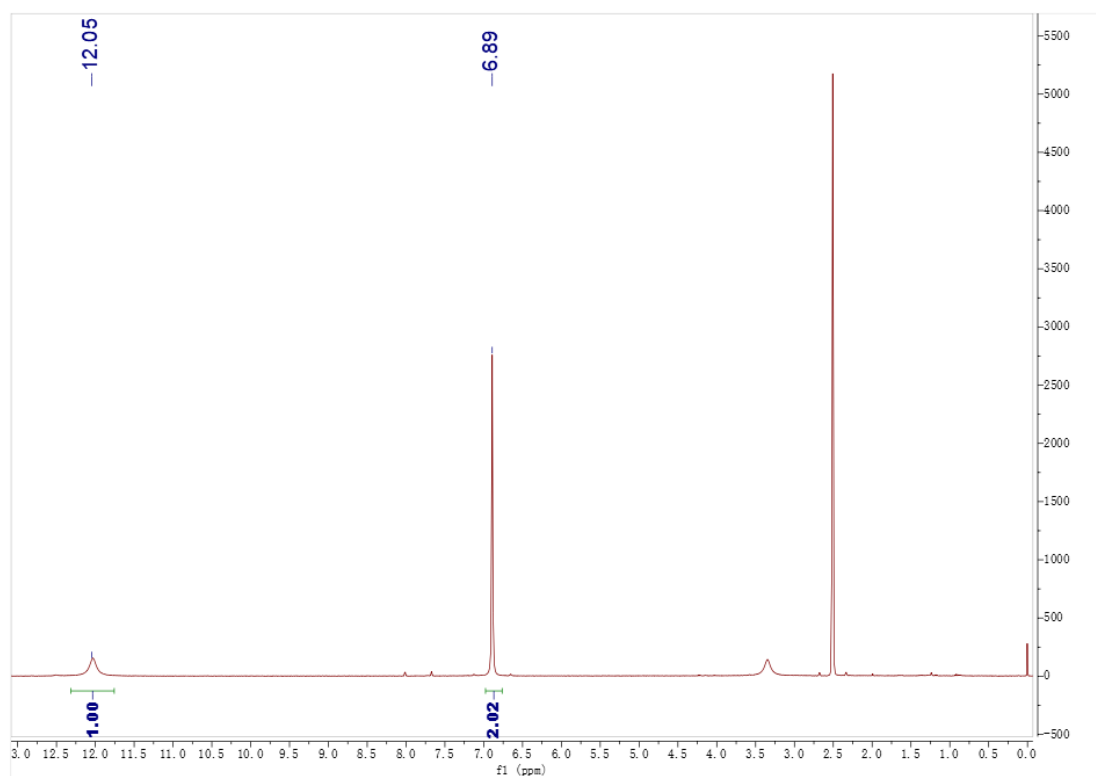

<sup>1</sup>H NMR (400 MHz, DMSO-*d*<sub>6</sub>) δ 12.05 (s, 1H), 6.89 (s, 2H).

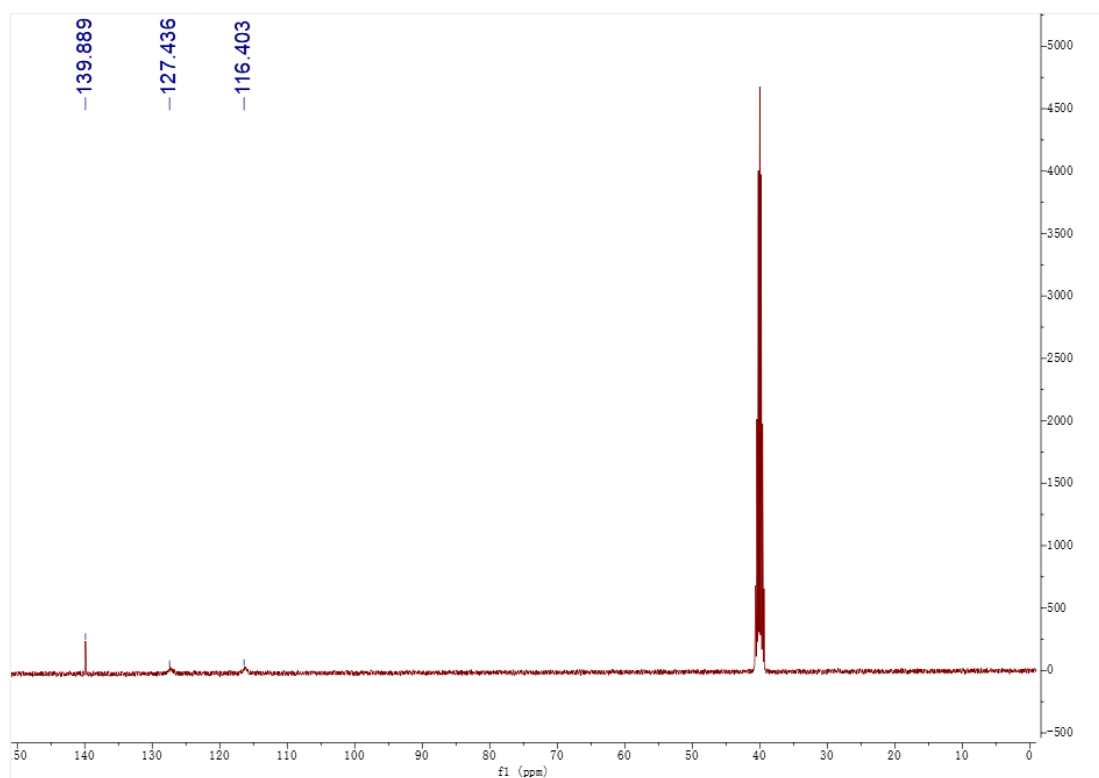

<sup>13</sup>C NMR (101 MHz, DMSO) δ 139.89, 127.44, 116.40.

Table S1. The QYs of the N-dots synthesized using different hydroxyl compounds as additives with 50% water in volume (Other reaction conditions: 120 °C, 30 min, 50 W).

| Additive | propanol | 1,2-propanediol | glycerol |
|----------|----------|-----------------|----------|
| QY (%)   | 10.9     | 22.2            | 27.9     |

Table S2. The QYs of the N-dots synthesized at different concentrations of glycerol (Other microwave reaction conditions: 120 °C, 30 min, 50 W).

| V(glycerol):V(H <sub>2</sub> O) | 1:0  | 4:1  | 2:1  | 1:1  | 1:2  | 1:4  | 0:1 |
|---------------------------------|------|------|------|------|------|------|-----|
| QY (%)                          | 10.8 | 25.7 | 27.6 | 27.9 | 24.5 | 24.3 | 8.7 |

Table S3. The QYs of the N-dots synthesized at different reaction temperatures (Other reaction conditions: 50% glycerol/water (v/v), 30 min, 50 W)

| T (°C) | 50 | 70 | 100 | 120  | 140  |
|--------|----|----|-----|------|------|
| QY (%) | -  | 18 | 22  | 27.9 | 27.4 |

Table S4. The QYs of the N-dots synthesized at different reaction time (Other reaction conditions: 50% glycerol/water (v/v), 120 °C, 50 W)

| Reaction time (min) | 15 | 30   | 60 | 120 |
|---------------------|----|------|----|-----|
| QY (%)              | 25 | 27.9 | 27 | 23  |

Table S5. Fluorescence lifetime value and relative content of the N-dots in the absence and presence of Ag<sup>+</sup> (The concentrations of the N-dots and Ag<sup>+</sup> were 100 µg/mL and 10 µM, respectively).

|                       | Param | Value/ns | Rel.% |
|-----------------------|-------|----------|-------|
| CDs                   | τ1    | 3.41     | 16.39 |
|                       | τ2    | 9.33     | 83.61 |
| CDs + Ag <sup>+</sup> | τ1    | 3.91     | 23.49 |
|                       | τ2    | 9.87     | 76.61 |

Table S6. Comparison of the present approach with other reported methods for the Ag<sup>+</sup> sensing.

| Sensing material | Method      | Linear range      | LOD           | Reference in main text |
|------------------|-------------|-------------------|---------------|------------------------|
| BSA@AuNCs        | Colorimetry | 0.5-10 $\mu$ M    | 0.204 $\mu$ M | [48]                   |
| AuNPs            | Colorimetry | 0.13-1.12 $\mu$ M | 62.0 nM       | [49]                   |
| Peptide-AuNPs    | Colorimetry | 10-1000 nM        | 7.4 nM        | [50]                   |
| S-GQDs           | Fluorometry | 0.1-130.0 $\mu$ M | 30 nM         | [51]                   |
| N-doped CDs      | Fluorometry | 1-7 $\mu$ M       | 0.20 $\mu$ M  | [47]                   |
| N-CDs            | Fluorometry | 30-90 $\mu$ M     | 0.45 $\mu$ M  | [46]                   |
| N-dots           | Fluorometry | 0-20 $\mu$ M      | 0.48 $\mu$ M  | [15]                   |
| N-doped CDs      | Fluorometry | 1-1000 $\mu$ M    | 10 nM         | [45]                   |
| N-dots           | Fluorometry | 20 nM-6 $\mu$ M   | 6.3 nM        | This work              |
